# Supplementary material for: Characterization of a Mutant Deficient for Ammonium and Nitric Oxide Signalling in the Model System Chlamydomonas reinhardtii
Source: PubMed Central journal article supplement (PMC4858171; doi:10.1371/journal.pone.0155128), 2016-05-05

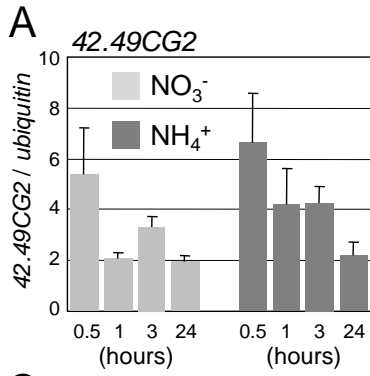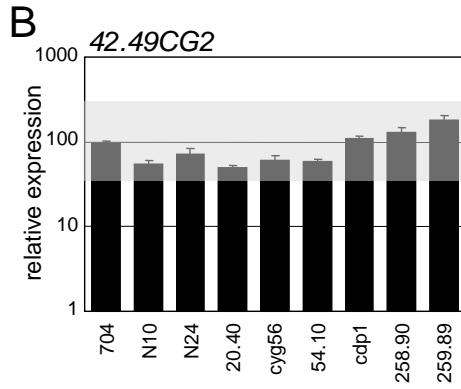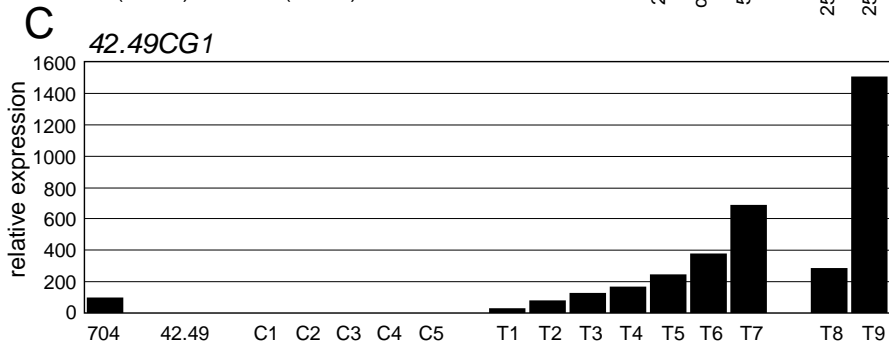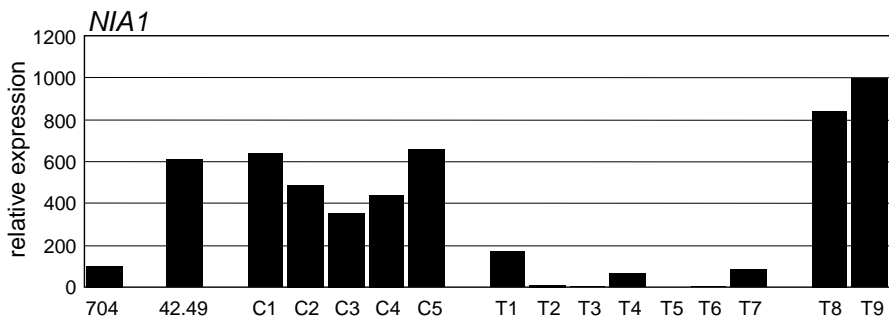

Supplement: pone.0155128.s002.pdf [file pone.0155128.s002.pdf]
