# Supplementary material for: Characterization of a Mutant Deficient for Ammonium and Nitric Oxide Signalling in the Model System Chlamydomonas reinhardtii
Source: PubMed Central journal article supplement (PMC4858171; doi:10.1371/journal.pone.0155128), 2016-05-05

**A**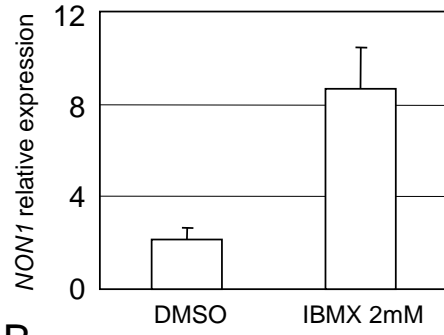**B**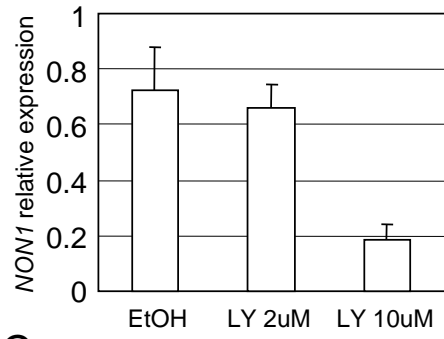**C**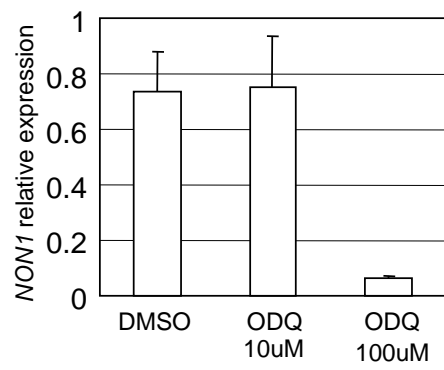

Supplement: pone.0155128.s004.pdf [file pone.0155128.s004.pdf]
